# Supplementary figures and images for: Green-synthesized Fe–Zn bimetallic nanoparticles alleviated cadmium accumulation and enhanced plant growth in Oryza sativa L. cv. (IR64)
Source: Royal Society of Chemistry journal article supplement (doi:10.1039/d5en00620a), 2025-01-01

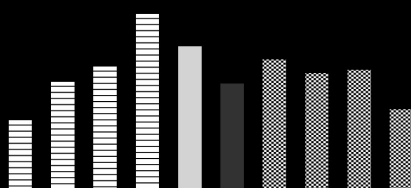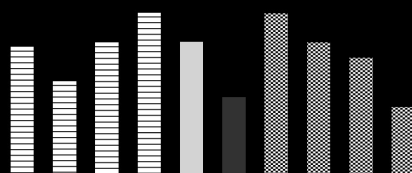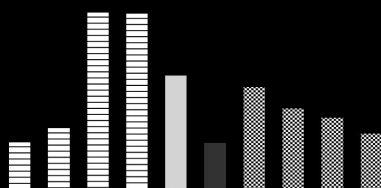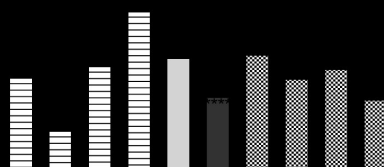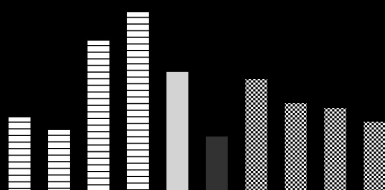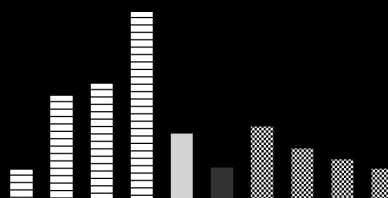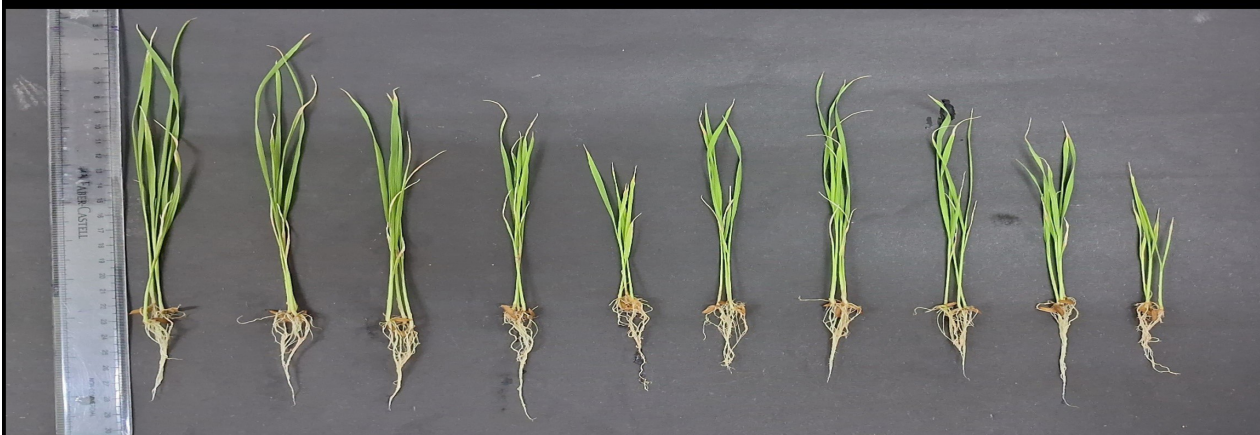

Supplement: d5en00620a3.pdf [file d5en00620a3.pdf]

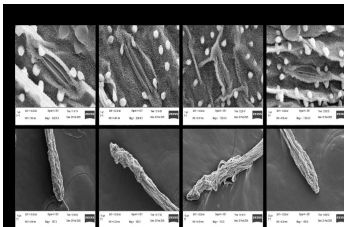

Supplement: d5en00620a5.pdf [file d5en00620a5.pdf]

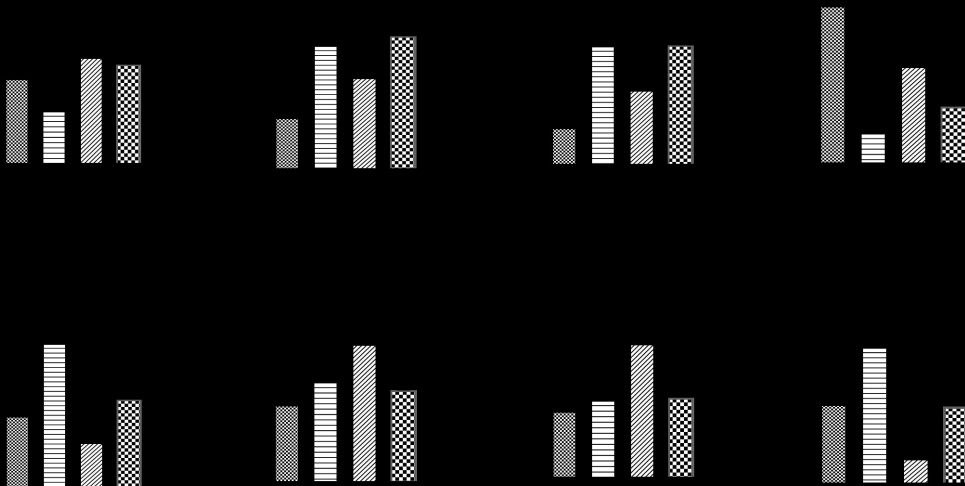

Supplement: d5en00620a7.pdf [file d5en00620a7.pdf]
